# Supplementary material for: Irradiation regulates the size of Pt nanoparticles on Au@MnO2nanosheets for electrocatalytic hydrogen evolution
Source: Royal Society of Chemistry journal article supplement (doi:10.1039/d1nj04433h), 2021-01-01
Supplement: d1nj04433h1.pdf [file d1nj04433h1.pdf]

## Supporting information

### **Irradiation regulates the size of Pt nanoparticles on Au@MnO<sub>2</sub> nanosheets for electrocatalytic hydrogen evolution**

Ting Li <sup>a, b, c</sup>, Yidan Liu <sup>a, b</sup>, Rongrong Jia <sup>b</sup>, Muhammad Yaseen <sup>d</sup>, Liyi Shi <sup>b</sup> and Lei Huang <sup>b\*</sup>

<sup>a</sup> School of Materials Science and Engineering, Shanghai University, Shanghai 200444, P. R. China.

<sup>b</sup> Research Center of Nano Science and Technology, College of Sciences, Shanghai University, Shanghai 200444, P. R. China.

<sup>c</sup> Jiangxi Province Key Laboratory of Polymer Preparation and Processing, Shangrao Normal University, Shangrao 334001, P. R. China.

<sup>d</sup> Institute of Chemical Sciences, University of Peshawar, 25120, KP, Pakistan

\*Corresponding authors. Fax: +86-21-66137426; Tel: +86-21-66137426.

*E-mail addresses:* leihuang@shu.edu.cn (L. Huang)

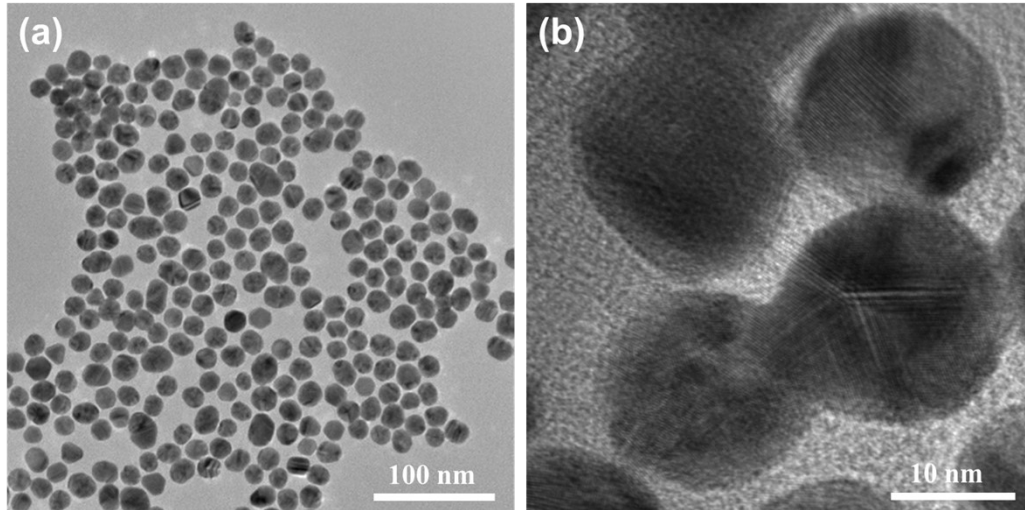

**Fig. S1.** TEM images of Au nanoparticles.

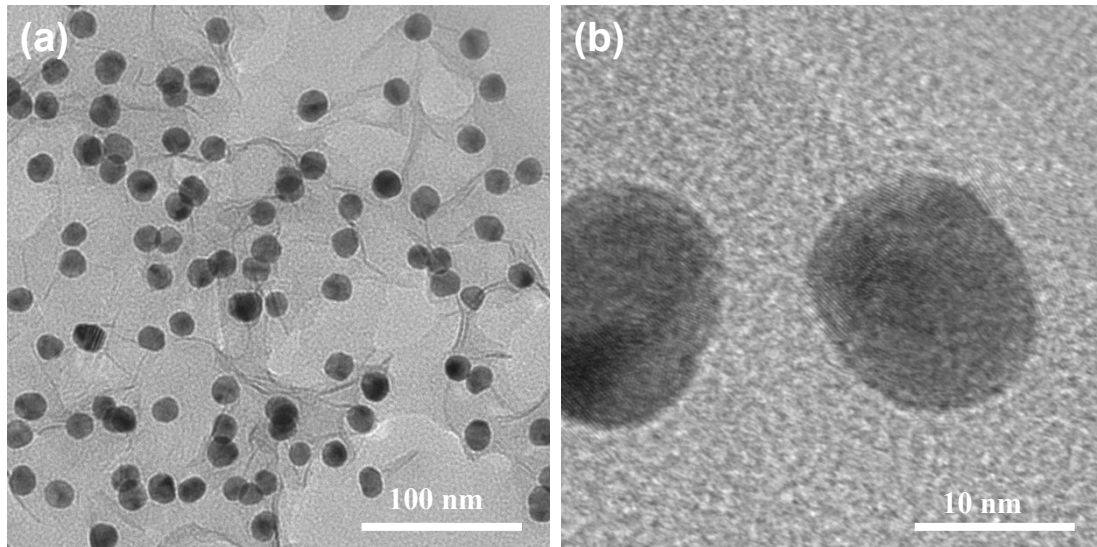

**Fig. S2.** TEM images of Au@MnO<sub>2</sub> nanosheets.

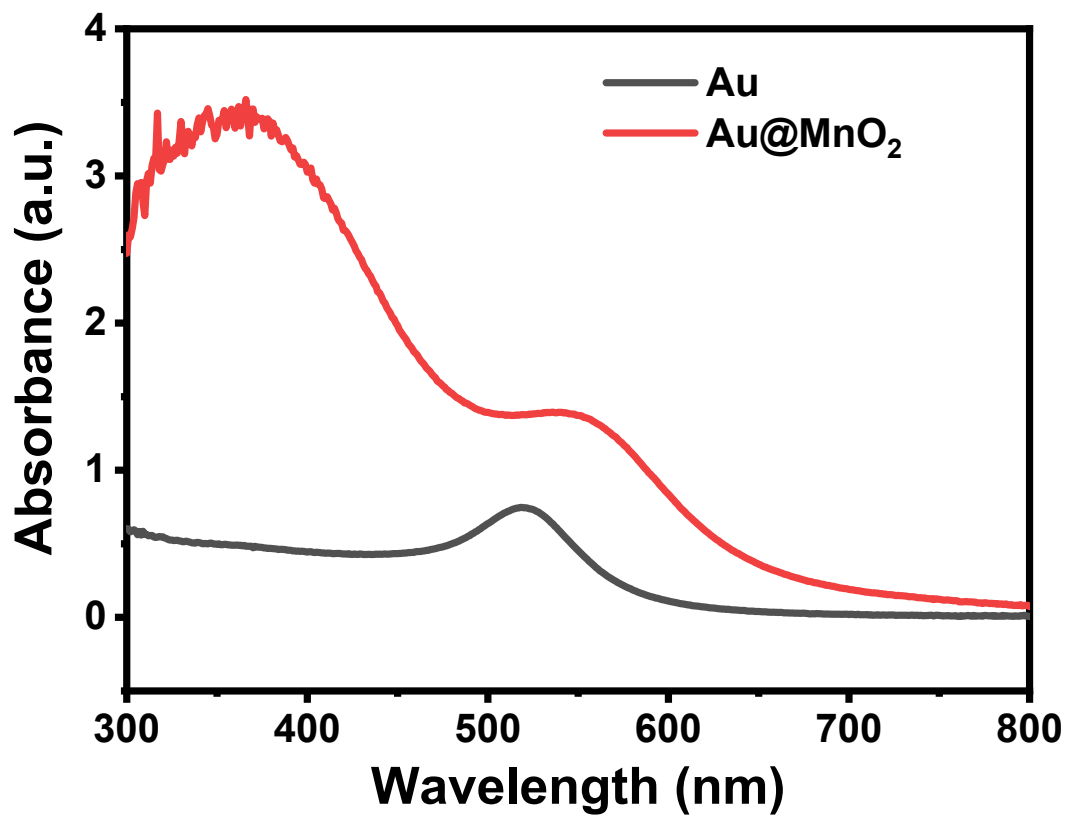

Fig. S3. UV-vis absorption spectra of Au NPs and Au@MnO<sub>2</sub> nanosheets.

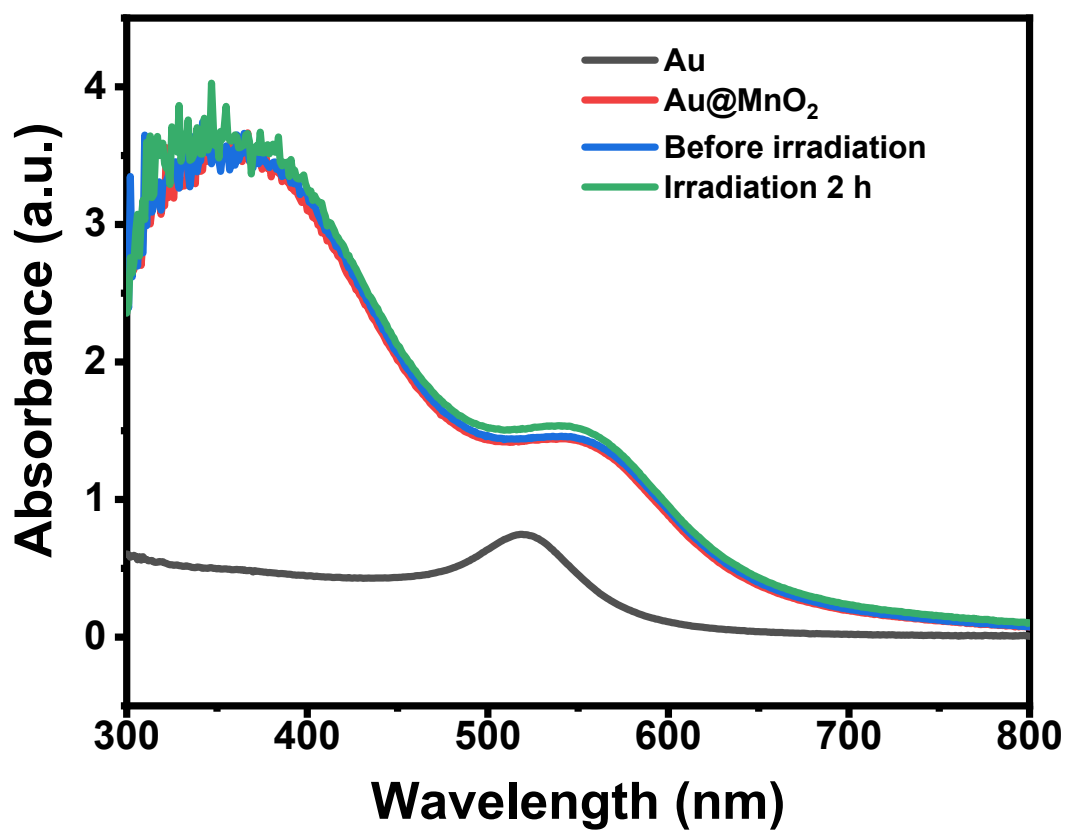

Fig. S4. UV-vis absorption spectra of Ag-520/Au@MnO<sub>2</sub>.

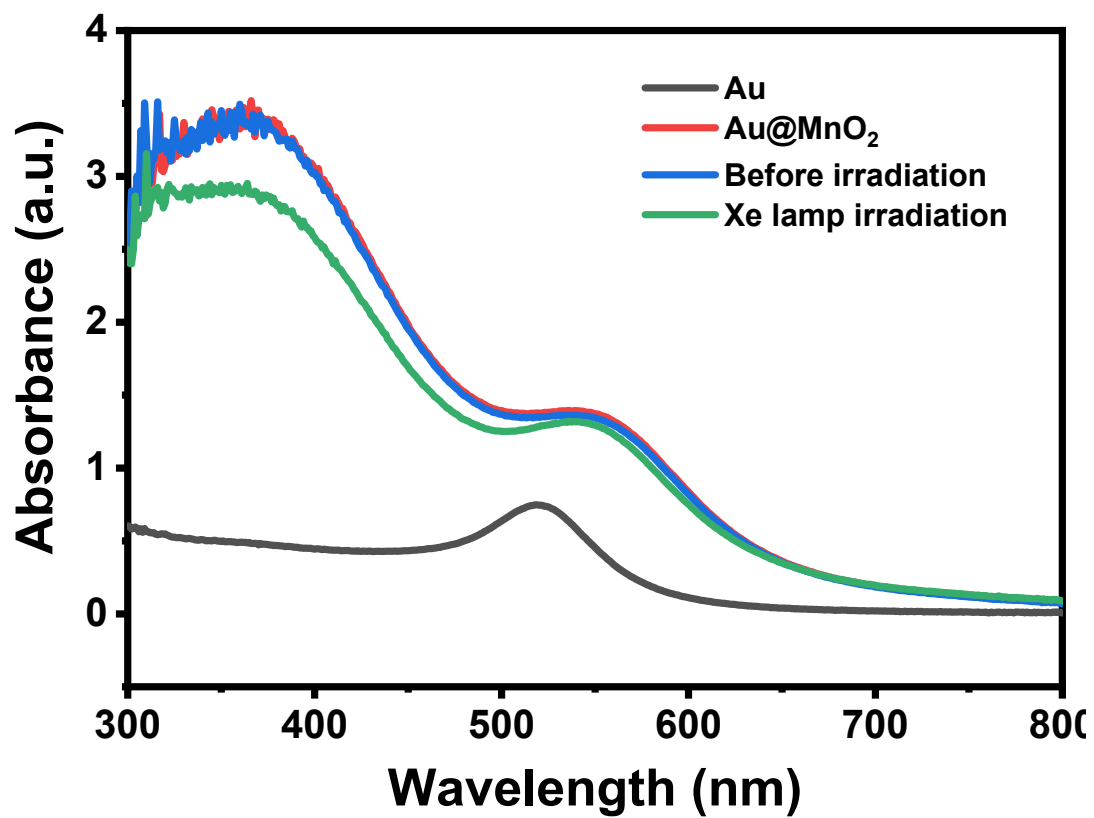

Fig. S5. UV-vis absorption spectra of Pt-Xe/Au@MnO<sub>2</sub>.

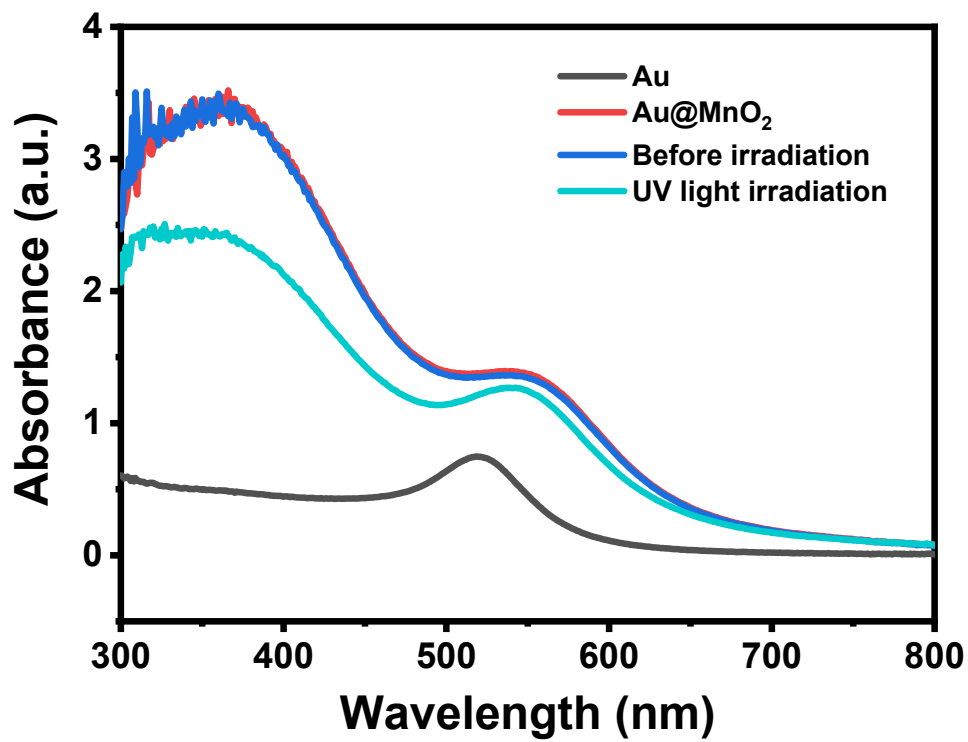

Fig. S6. UV-vis absorption spectra of Pt-400/Au@MnO<sub>2</sub>.

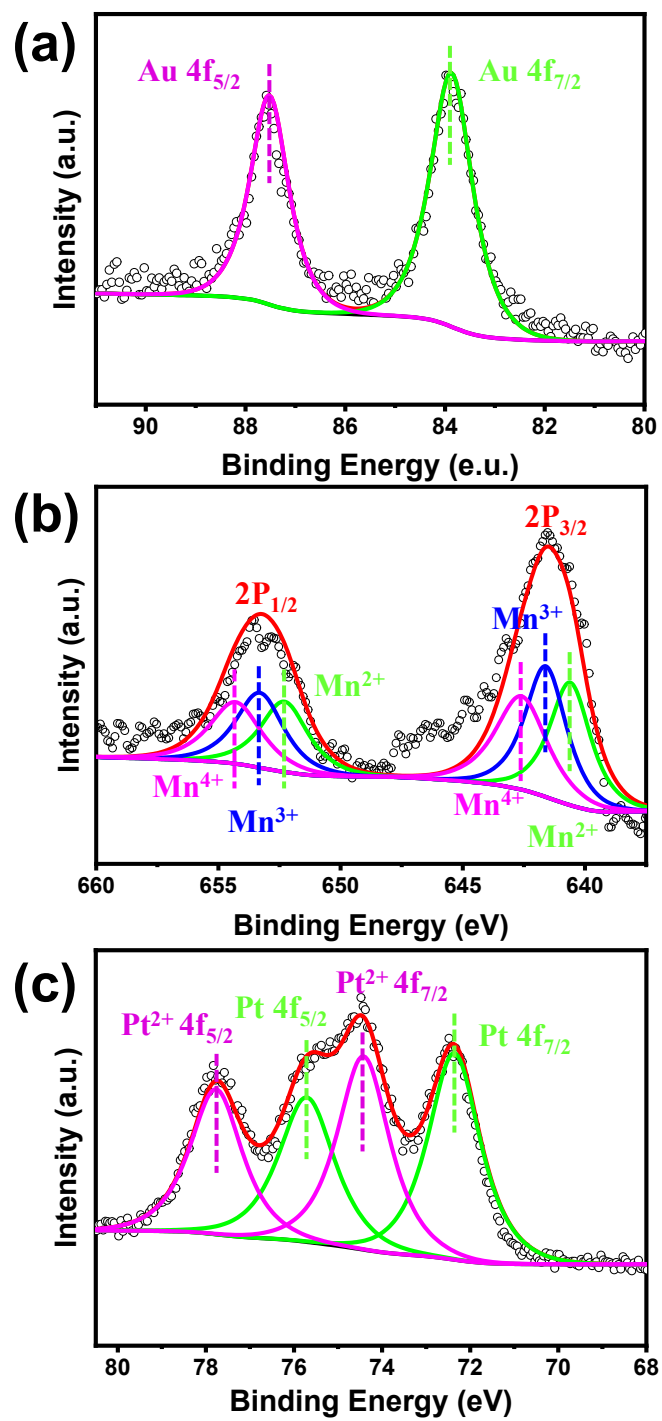

Fig. S7. Au 4f (a), Mn 2p (b) and Pt 4f (c) XPS spectra of Pt-400/Au@MnO<sub>2</sub>.



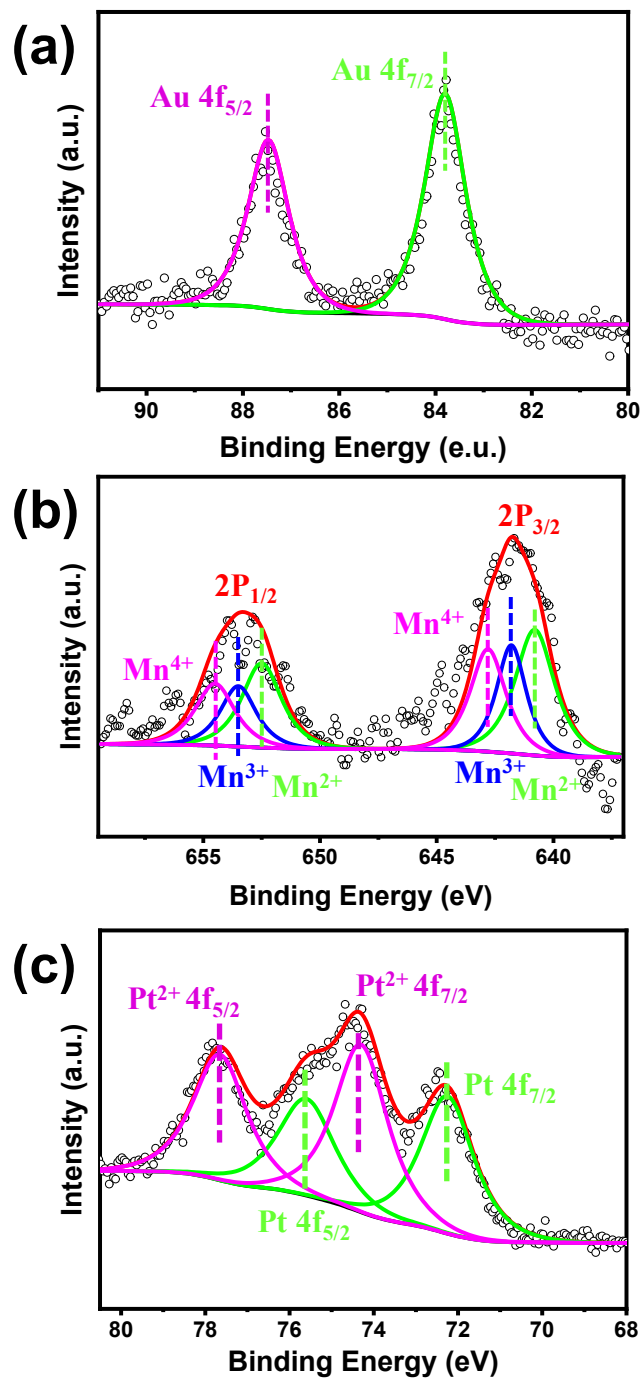

Fig. S8. Au 4f (a), Mn 2p (b) and Pt 4f (c) XPS spectra of Pt-Xe/Au@MnO<sub>2</sub>.

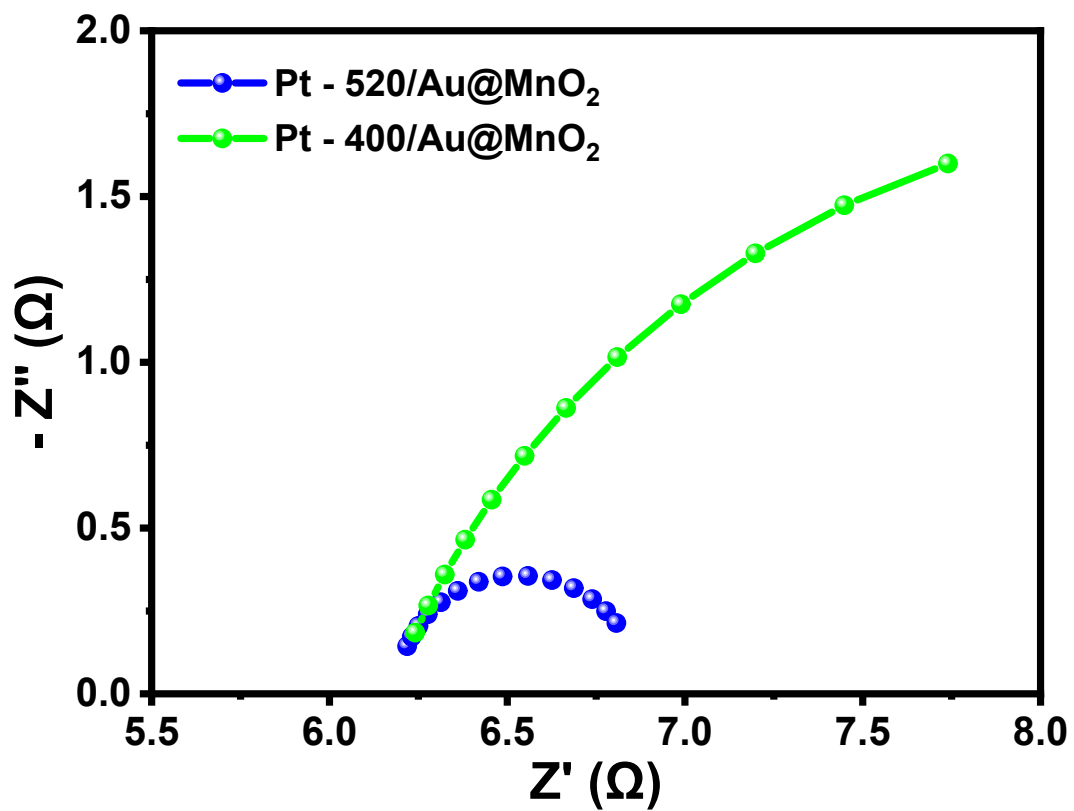

**Fig. S9.** Electrochemical impedance spectroscopy (EIS) curves of Pt-400/Au@MnO<sub>2</sub>, Pt-520/Au@MnO<sub>2</sub>.

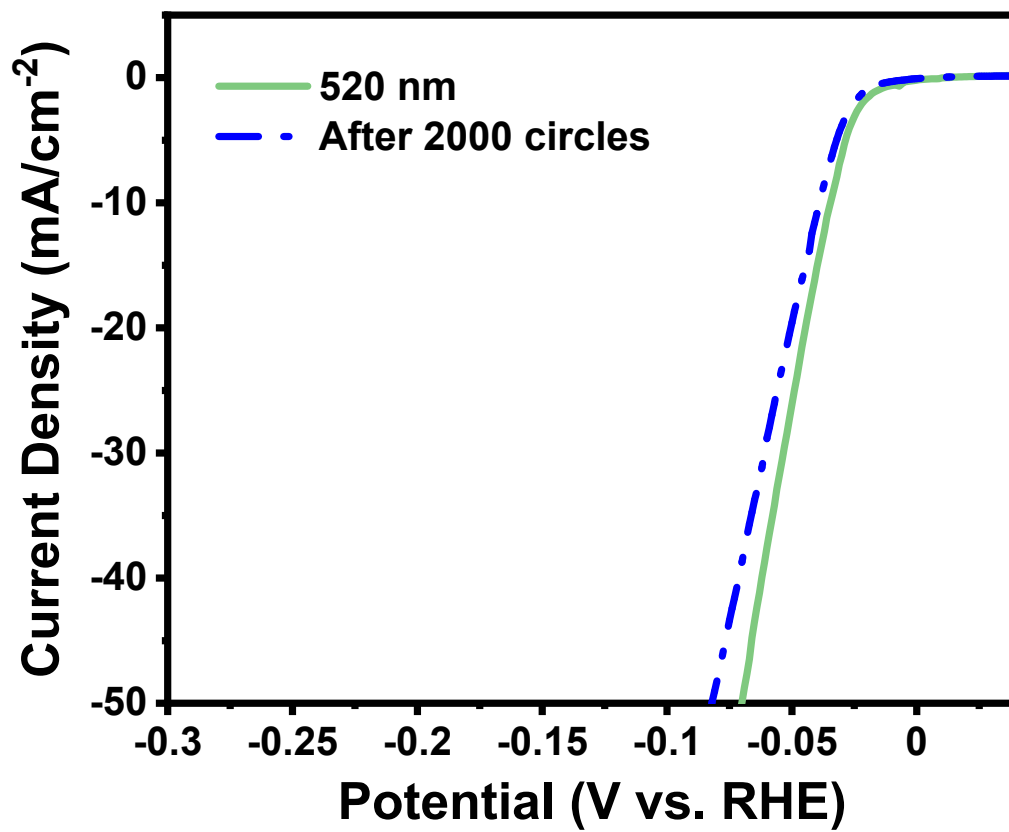

Fig. S10. Durability test of the Pt-520/Au@MnO<sub>2</sub>.

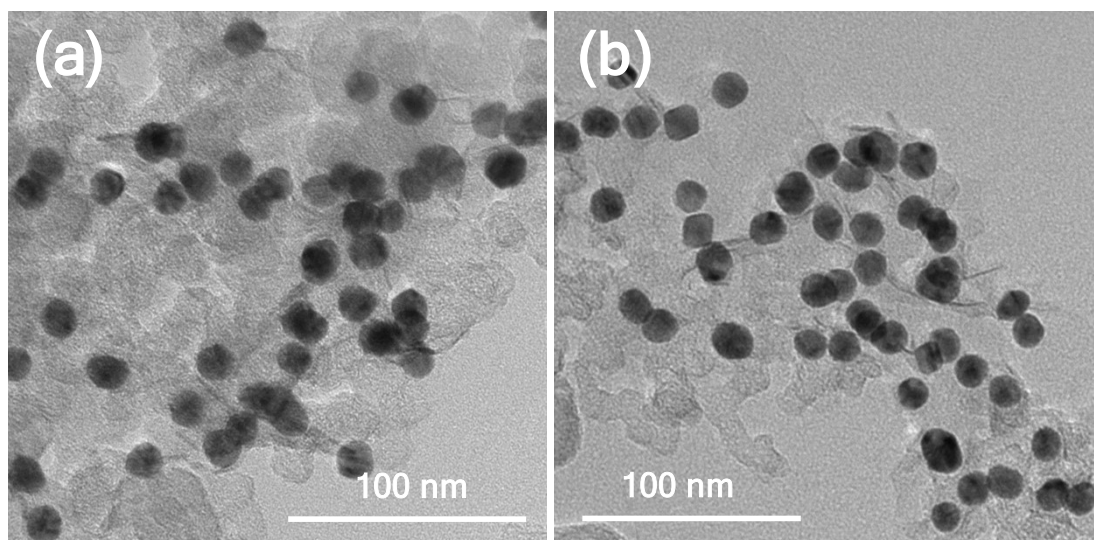

**Fig. S11.** TEM images of carbon powder supported Pt-520/Au@MnO<sub>2</sub> catalyst before and after chronoamperometry measurement for 12 h.

**Table S1.** Comparison of HER performance of the Pt-based catalysts.

| Catalyst                                            | Electrolyte                          | $\eta$ (mV) @ 10 mA $\cdot$ cm <sup>-2</sup> | Mass activity (A $\cdot$ mg <sub>Pt</sub> <sup>-1</sup> ) | Tafel (mV dec <sup>-1</sup> ) | Reference |
|-----------------------------------------------------|--------------------------------------|----------------------------------------------|-----------------------------------------------------------|-------------------------------|-----------|
| Pt-520/Au@MnO <sub>2</sub>                          | 0.5 M H <sub>2</sub> SO <sub>4</sub> | 36                                           | 17.5<br>( $\eta$ = 50 mV)                                 | 19                            | This work |
| 20 Wt.% Pt/C                                        | 0.5 M H <sub>2</sub> SO <sub>4</sub> | 41                                           | 1.33<br>( $\eta$ = 50 mV)                                 | 34                            | This work |
| PtAC-MnO <sub>2</sub>                               | 1 M PBS                              | 41                                           | 0.8<br>( $\eta$ = 50 mV)                                  | 67                            | 1         |
| Pt <sub>1</sub> /NCNS                               | 0.5 M H <sub>2</sub> SO <sub>4</sub> | 40                                           | 7.1<br>( $\eta$ = 50 mV)                                  | -                             | 2         |
| Pt/rGO/GCE                                          | 0.5 M H <sub>2</sub> SO <sub>4</sub> | 30                                           | -                                                         | 33                            | 3         |
| Pt-NiS <sub>2</sub> @CC                             | 0.5 M H <sub>2</sub> SO <sub>4</sub> | 60                                           | -                                                         | 28.9                          | 4         |
| Pt/NPSSF                                            | 0.5 M H <sub>2</sub> SO <sub>4</sub> | 73                                           | -                                                         | 49.85                         | 5         |
| Pt-MoS <sub>2</sub>                                 | 0.5 M H <sub>2</sub> SO <sub>4</sub> | 55                                           | -                                                         | 41                            | 6         |
| Pt@MoS <sub>2</sub>                                 | 0.5 M H <sub>2</sub> SO <sub>4</sub> | 88.34                                        | -                                                         | 55.69                         | 7         |
| Pt-MoS <sub>2</sub>                                 | 0.5 M H <sub>2</sub> SO <sub>4</sub> | 103                                          | -                                                         | 56                            | 8         |
| 1Pt/VS <sub>2</sub> /CP                             | 0.5 M H <sub>2</sub> SO <sub>4</sub> | 77                                           | 9.81<br>( $\eta$ = 50 mV)                                 | 40.13                         | 9         |
| Pt <sub>5</sub> /HMCS-5.08%                         | 0.5 M H <sub>2</sub> SO <sub>4</sub> | 20.7                                         | 12.8<br>( $\eta$ = 30 mV)                                 | 28.3                          | 10        |
| K <sub>2</sub> PtCl <sub>4</sub> @NC-M              | 0.5 M H <sub>2</sub> SO <sub>4</sub> | 11                                           | 5.6<br>( $\eta$ = 20 mV)                                  | 21                            | 11        |
| MoS <sub>x</sub> /CNTs/Pt                           | 0.5 M H <sub>2</sub> SO <sub>4</sub> | 25                                           | -                                                         | 27                            | 12        |
| Pt/Ru/VC                                            | 0.5 M H <sub>2</sub> SO <sub>4</sub> | 23                                           | 2.3<br>( $\eta$ = 40 mV)                                  | 30.6                          | 13        |
| Pt1/OLC                                             | 0.5 M H <sub>2</sub> SO <sub>4</sub> | 38                                           | 7.4<br>( $\eta$ = 38 mV)                                  | 36                            | 14        |
| Pt@NOMC-A                                           | 0.5 M H <sub>2</sub> SO <sub>4</sub> | 8                                            | 1.637<br>( $\eta$ = 50 mV)                                | 43                            | 15        |
| Pt/G <sub>5</sub> -(MoS <sub>2</sub> ) <sub>5</sub> | 0.5 M H <sub>2</sub> SO <sub>4</sub> | 33                                           | -                                                         | 23                            | 16        |
| Pt <sub>1.8</sub> MoS <sub>2</sub>                  | 0.5 M H <sub>2</sub> SO <sub>4</sub> | 80                                           | -                                                         | 48                            | 17        |
| Pt/MoS <sub>2</sub> -80                             | 0.5 M H <sub>2</sub> SO <sub>4</sub> | 31                                           | -                                                         | 52                            | 18        |

1. J.-X. Wei, M.-Z. Cao, K. Xiao, X.-P. Guo, S.-Y. Ye and Z.-Q. Liu, *Small Struct.*, 2021, **2**, 2100047.
2. J. Li, M. N. Banis, Z. Ren, K. R. Adair, K. Doyle-Davis, D. M. Meira, Y. Z. Finfrock, L. Zhang, F. Kong, T. K. Sham, R. Li, J. Luo and X. Sun, *Small*, 2021, **17**, e2007245.
3. S. Ghasemi, S. R. Hosseini and S. Nabipour, *J. Iran. Chem. Soc.*, 2018, **16**, 101-109.
4. K. Li, J. Xu, C. Chen, Z. Xie, D. Liu, D. Qu, H. Tang, Q. Wei, Q. Deng, J. Li and N. Hu, *J. Colloid Interface Sci.*, 2021, **582**, 591-597.
5. Y. Tan, Y. Wei, K. Liang, L. Wang and S. Zhang, *Int. J. Hydrogen Energy*, 2021, **46**,

26340-26346.

6. L. Mei, X. Gao, Z. Gao, Q. Zhang, X. Yu, A. L. Rogach and Z. Zeng, *Chem. Commun.*, 2021, **57**, 2879-2882.
7. Y. Li, Q. Gu, B. Johannessen, Z. Zheng, C. Li, Y. Luo, Z. Zhang, Q. Zhang, H. Fan, W. Luo, B. Liu, S. Dou and H. Liu, *Nano Energy*, 2021, **84**.
8. M. Li, Y.-C. Kuo, X. Chu, D. Chu and J. Yi, *Emergent Mater.*, 2021, **4**, 579-587.
9. J. Zhu, L. Cai, X. Yin, Z. Wang, L. Zhang, H. Ma, Y. Ke, Y. Du, S. Xi, A. T. S. Wee, Y. Chai and W. Zhang, *ACS Nano*, 2020, **14**, 5600-5608.
10. X. K. Wan, H. B. Wu, B. Y. Guan, D. Luan and X. W. D. Lou, *Adv. Mater.*, 2020, **32**, e1901349.
11. H. Jin, S. Sultan, M. Ha, J. N. Tiwari, M. G. Kim and K. S. Kim, *Adv. Funct. Mater.*, 2020, **30**.
12. Y. Zhan, Y. Li, Z. Yang, X. Wu, M. Ge, X. Zhou, J. Hou, X. Zheng, Y. Lai, R. Pang, H. Duan, X. Chen, H. Nie and S. Huang, *Adv. Sci.*, 2019, **6**, 1801663.
13. W. Luo, J. Gan, Z. Huang, W. Chen, G. Qian, X. Zhou and X. Duan, *Front. Mater.*, 2019, **6**.
14. D. Liu, X. Li, S. Chen, H. Yan, C. Wang, C. Wu, Y. A. Haleem, S. Duan, J. Lu, B. Ge, P. M. Ajayan, Y. Luo, J. Jiang and L. Song, *Nat. Energy*, 2019, **4**, 512-518.
15. Y. Yin, T. Liu, D. Liu, Z. Wang, Q. Deng, D. Qu, Z. Xie, H. Tang and J. Li, *J. Colloid Interface Sci.*, 2018, **530**, 595-602.
16. Z. Gao, M. Li, J. Wang, J. Zhu, X. Zhao, H. Huang, J. Zhang, Y. Wu, Y. Fu and X. Wang, *Carbon*, 2018, **139**, 369-377.
17. X. Chia, N. A. A. Sutrisnoh and M. Pumera, *ACS Appl. Mater. Interfaces*, 2018, **10**, 8702-8711.
18. W. Ren, H. Zhang and C. Cheng, *Electrochim. Acta*, 2017, **241**, 316-322.
